# Supplementary material
Source: Research Square preprint supplement (doi:10.21203/rs.3.rs-9134629/v1)
Supplement: Supplementary file 1 [file 02a303c318274a7cbdc9a0c7.docx]

**Table S1**: The table shows a) Inclusion and exclusion criteria, b) Clinical data of Phase 1 and c) Clinical data of Phase 2.

| **Table S1a: Inclusion and exclusion criteria** | |
| --- | --- |
| **Inclusion criteria** | |
| Age | 18-59 years |
| Gender | Male and Female (Both) |
| **Exclusion criteria** | |
| Alcohol consumption | ≥ 20 grams/ day |
| Other types of diabetes | T1DM, GDM |
| Antibiotics intake | Less than 3 weeks before recruitment |

| **Table S1b: Clinical data of the study participants: Phase 1** | | | |
| --- | --- | --- | --- |
| **Characteristics** | **Control** | **Obesity** | **T2DM** |
| Total | 23 | 26 | 27 |
| Male | 12 | 12 | 17 |
| Female | 11 | 14 | 10 |
| Age (years, mean ± SD) | 27.6 ± 10.8 | 35.8 ± 11.8 | 48.5 ± 14.9 |
| Weight (kg, mean ± SD) | 63.4 ± 9.8 | 98.9 ± 20.7 | 67.5 ± 8.7 |
| Height (cm, mean ± SD) | 164.5 ± 9.8 | 159.9 ± 9.9 | 161.8 ± 9.7 |
| BMI (kg/m2, mean ± SD) | 23.3 ± 2.6 | 38.9 ± 7.8 | 25.9 ± 3.2 |
| HbA1c (%) (mean ± SD) | NA | 6.9 ± 2.1 | 7.9 ± 1.9 |

| **Table S1c: Clinical data of the study participants: Phase 2** | | |
| --- | --- | --- |
| **Characteristics** | **Obesity** | **T2DM** |
| Total enrolled at beginning of study | 26 | 27 |
| Total at end of study (due to participant drop-outs) | 12 | 12 |
| Male (at end of study) | 6 | 6 |
| Female (at end of study) | 6 | 6 |
| Age (years, mean ± SD) (at end of study) | 29.4 ± 10.1 | 42.5 ± 11.7 |
| Weight (kg, mean ± SD) (at end of study) | 90.7 ± 17.9 | 73.4 ± 7.3 |
| Height (cm, mean ± SD) (at end of study) | 161.4 ± 9.3 | 157.8 ± 8.9 |
| BMI (kg/m2, mean ± SD) (at end of study) | 34.4 ± 4.5 | 29.6 ± 4.9 |
| HbA1c (%) (mean ± SD) (at end of study) | 5.4 ± 0.8 | 8.2 ± 2.5 |
