# Supplementary material
Source: Research Square preprint supplement (doi:10.21203/rs.3.rs-9134629/v1)
Supplement: Supplementary file 2 [file cbb2f3e4d562abdc92d97db2.docx]

**Supplementary Table and Figure Legends**

**Table S1**  Baseline demographic, clinical, and biochemical characteristics of the Phase 1 cohort. The table summarizes age, sex, BMI, fasting blood glucose (FBG), postprandial blood glucose (PPBG), HbA1c, and other relevant metadata representing their metabolic status for 76 adults across healthy control, obesity, and type 2 diabetes (T2D) groups who provided paired stool and fingerstick blood samples.

**Fig. S1** Gut microbiome alpha diversity across cohorts. Shannon index, Simpson index, and observed genus richness are shown for healthy control, obese, and T2D participants. Healthy controls exhibit the highest diversity, with progressively reduced diversity in obesity and T2D. Boxplots show median and interquartile range; whiskers denote 1.5× IQR.

**Fig. S2** Beta diversity of gut microbial communities across metabolic cohorts. Principal coordinates analysis (PCoA) based on Bray–Curtis dissimilarity demonstrates tighter clustering of healthy control samples compared to greater dispersion among obesity and T2D samples.

**Fig. S3** Genus-wise performance of prediction accuracy of gut microbes. Classification index (CI) accuracy is shown for individual genera, demonstrating variable performance across taxa but consistently high accuracy for prevalent gut microbial genera.

**Fig. S4** Metabolomics quality control and batch-effect assessment. Coefficient of variation (CV%) for metabolite quality-control samples indicates low analytical variability (most CV% < 10%). Principal component analysis of metabolomics data shows separation by clinical cohort rather than analytical batch, indicating minimal batch effects.

**Fig. S5** Heatmaps of metabolite–microbe associations stratified by study cohort. Top 50 metabolite–genus correlations are shown separately for healthy control, obesity, and T2D groups.

**Fig. S6** Longitudinal trajectories of each subject (“spaghetti plots”). Individual trajectories of fasting blood glucose (FBG), postprandial blood glucose (PPBG), HbA1c, and body weight across the study period are shown for obesity and T2D participants.
